# Supplementary material for: Genome-wide identification, characterization, and expression patterns analysis of the SBP-box gene family in wheat (Triticum aestivum L.)
Source: PubMed Central journal article supplement (PMC7560695; doi:10.1038/s41598-020-74417-x), 2020-10-14
Supplement: 41598_2020_74417_MOESM1_ESM.pdf [file 41598_2020_74417_MOESM1_ESM.pdf]

**Genome-wide identification, characterization, and expression patterns analysis  
of the SBP-box gene family in wheat (*Triticum aestivum* L.)**

**Ying Li<sup>1,2,3,4,5</sup>, Qilu Song<sup>1,2,3,4,5</sup>, Yamin Zhang<sup>1,2,3,4,5</sup>, Zheng Li<sup>1,2,3,4,5</sup>, Jialin Guo<sup>1,2,3,4,5</sup>, Xinhong Chen<sup>1,2,3,4,5\*</sup> and Gaisheng Zhang<sup>1,2,3,4,5\*</sup>**

<sup>1</sup>College of Agronomy, Northwest A & F University, Yangling, Shaanxi, 712100, P.R. China. <sup>2</sup>National Yangling Agricultural Biotechnology & Breeding Center, Yangling, Shaanxi, 712100, P.R. China. <sup>3</sup>Yangling Branch of State Wheat Improvement Centre, Yangling, Shaanxi, 712100, P.R. China. <sup>4</sup>Wheat Breeding Engineering Research Center, Ministry of Education, Yangling, Shaanxi, 712100, P.R. China. <sup>5</sup>Key Laboratory of Crop Heterosis of Shaanxi Province, Yangling, Shaanxi, 712100, P.R. China.

\* **Correspondence:** cxh2089@126.com, zhanggaisheng18@sohu.com

Table S1: The detailed information of TaSBPs

| Gene Name          | Gene ID  | Chrom no | Location  |           | Properties of proteins |                       | pI   | GRAVY  | Subcell location | EST validation |
|--------------------|----------|----------|-----------|-----------|------------------------|-----------------------|------|--------|------------------|----------------|
|                    |          |          |           |           | Protein length (aa)    | Molecular weight (Da) |      |        |                  |                |
| TraesCS1A02G255300 | TaSBP1A  | 1A       | 447623204 | 447635025 | 859                    | 94154.99              | 5.84 | -0.299 | Nuclear          | 34             |
| TraesCS1B02G266100 | TaSBP1B  | 1B       | 467540751 | 467553928 | 861                    | 94260.18              | 5.83 | -0.293 | Nuclear          | 34             |
| TraesCS1D02G254700 | TaSBP1D  | 1D       | 347199194 | 347210946 | 859                    | 93957.68              | 5.81 | -0.308 | Nuclear          | 34             |
| TraesCS2A02G232400 | TaSBP2A  | 2A       | 276276336 | 276279155 | 192                    | 20127.47              | 9.87 | -0.611 | Nuclear          | 28             |
| TraesCS2B02G250900 | TaSBP2B  | 2B       | 260765427 | 260768180 | 192                    | 20117.43              | 9.87 | -0.607 | Nuclear          | 31             |
| TraesCS2D02G232800 | TaSBP2D  | 2D       | 206632153 | 206636152 | 192                    | 20129.44              | 9.87 | -0.625 | Nuclear          | 28             |
| TraesCS2A02G413900 | TaSBP3A  | 2A       | 670957294 | 670962629 | 349                    | 36409.02              | 9.47 | -0.383 | Nuclear          | 13             |
| TraesCS2D02G410700 | TaSBP3D  | 2D       | 525512403 | 525517689 | 355                    | 36947.6               | 9.39 | -0.385 | Nuclear          | 12             |
| TraesCS2B02G530400 | TaSBP4B  | 2B       | 725575939 | 725580611 | 408                    | 43960.41              | 7.24 | -0.758 | Nuclear          | 1              |
| TraesCS2A02G502300 | TaSBP4A  | 2A       | 730613571 | 730617739 | 412                    | 44489                 | 7.26 | -0.779 | Nuclear          | 0              |
| TraesCS2D02G502900 | TaSBP4D  | 2D       | 596550011 | 596554762 | 407                    | 43872.39              | 7.79 | -0.751 | Nuclear          | 1              |
| TraesCS3A02G432500 | TaSBP5A  | 3A       | 673898993 | 673902601 | 415                    | 43741.55              | 8.93 | -0.548 | Nuclear          | 14             |
| TraesCS3B02G468400 | TaSBP5B  | 3B       | 713320663 | 713324953 | 414                    | 43481.25              | 8.93 | -0.518 | Nuclear          | 16             |
| TraesCS3D02G425800 | TaSBP5D  | 3D       | 538401064 | 538404375 | 419                    | 44183.04              | 8.93 | -0.529 | Nuclear          | 18             |
| TraesCS4A02G359500 | TaSBP6A  | 4A       | 632857804 | 632864321 | 962                    | 105372.91             | 5.73 | -0.306 | Nuclear          | 52             |
| TraesCS5A02G286700 | TaSBP7A  | 5A       | 494569538 | 494575755 | 430                    | 44923.11              | 6.88 | -0.395 | Nuclear          | 13             |
| TraesCS5B02G286000 | TaSBP7B  | 5B       | 471401006 | 471406978 | 433                    | 45255.54              | 6.88 | -0.381 | Nuclear          | 13             |
| TraesCS5D02G294400 | TaSBP7D  | 5D       | 391372552 | 391378851 | 432                    | 45253.53              | 6.88 | -0.373 | Nuclear          | 14             |
| TraesCS5B02G265600 | TaSBP8B  | 5B       | 450105102 | 450108305 | 487                    | 45151.6               | 8.87 | -0.66  | Nuclear          | 3              |
| TraesCS6A02G110100 | TaSBP9A  | 6A       | 79267605  | 79271671  | 475                    | 51411.39              | 9.18 | -0.651 | Nuclear          | 20             |
| TraesCS6B02G138400 | TaSBP9B  | 6B       | 135858620 | 135862931 | 381                    | 41620.78              | 9.7  | -0.713 | Nuclear          | 30             |
| TraesCS6D02G098500 | TaSBP9D  | 6D       | 62113576  | 62118381  | 473                    | 51243.17              | 9.19 | -0.662 | Nuclear          | 30             |
| TraesCS6A02G155300 | TaSBP10A | 6A       | 143965449 | 143969690 | 328                    | 35420.76              | 9.34 | -0.629 | Nuclear          | 9              |
| TraesCS6B02G183400 | TaSBP10B | 6B       | 204923634 | 204927878 | 327                    | 35317.66              | 9.34 | -0.664 | Nuclear          | 9              |
| TraesCS6D02G145200 | TaSBP10D | 6D       | 115545817 | 115550011 | 325                    | 35190.52              | 9.25 | -0.639 | Nuclear          | 20             |
| TraesCS6A02G152000 | TaSBP11A | 6A       | 136541404 | 136544531 | 448                    | 48092.44              | 6.54 | -0.608 | Nuclear          | 0              |
| TraesCS6B02G180300 | TaSBP11B | 6B       | 200508894 | 200512052 | 442                    | 47838.07              | 7.02 | -0.682 | Nuclear          | 0              |
| TraesCS6D02G142100 | TaSBP11D | 6D       | 111567310 | 111570133 | 452                    | 48862.29              | 7.27 | -0.659 | Nuclear          | 0              |
| TraesCS7A02G494800 | TaSBP12A | 7A       | 684292548 | 684297219 | 419                    | 45396.55              | 8.98 | -0.399 | Nuclear          | 2              |
| TraesCS7D02G482200 | TaSBP12D | 7D       | 592632237 | 592634499 | 408                    | 44132.98              | 9.86 | -0.547 | Nuclear          | 2              |
| TraesCS7A02G495000 | TaSBP13A | 7A       | 685212558 | 685214906 | 406                    | 43554.82              | 9.23 | -0.57  | Nuclear          | 6              |
| TraesCS7B02G402300 | TaSBP13B | 7B       | 668928550 | 668930740 | 390                    | 42165.25              | 9.3  | -0.627 | Nuclear          | 2              |
| TraesCS7D02G482400 | TaSBP13D | 7D       | 592816284 | 592819509 | 388                    | 41770.7               | 8.78 | -0.589 | Nuclear          | 3              |
| TraesCS7A02G494900 | TaSBP14A | 7A       | 685090082 | 685095954 | 394                    | 42655.9               | 9.16 | -0.578 | Nuclear          | 6              |
| TraesCS7B02G402400 | TaSBP14B | 7B       | 669139219 | 669141554 | 401                    | 43537.92              | 9.44 | -0.624 | Nuclear          | 4              |
| TraesCS7D02G482300 | TaSBP14D | 7D       | 592677316 | 592679805 | 405                    | 43409.77              | 9.17 | -0.566 | Nuclear          | 2              |
| TraesCS7A02G260500 | TaSBP15A | 7A       | 252715392 | 252720978 | 407                    | 43226.94              | 6.51 | -0.532 | Nuclear          | 14             |
| TraesCS7B02G158500 | TaSBP15B | 7B       | 214070642 | 214075881 | 409                    | 43463.29              | 6.51 | -0.502 | Nuclear          | 14             |
| TraesCS7D02G261500 | TaSBP15D | 7D       | 237410146 | 237416092 | 414                    | 43725.52              | 7.08 | -0.495 | Nuclear          | 14             |
| TraesCS7B02G142200 | TaSBP16B | 7B       | 181033715 | 181039167 | 1104                   | 120626.35             | 7.19 | -0.52  | Nuclear          | 85             |
| TraesCS7D02G248000 | TaSBP16D | 7D       | 219291031 | 219296565 | 1124                   | 123141.26             | 7.38 | -0.528 | Nuclear          | 86             |
| TraesCS7B02G144900 | TaSBP17B | 7B       | 187777243 | 187781491 | 386                    | 40242.21              | 8.97 | -0.751 | Nuclear          | 5              |
| TraesCS7D02G245200 | TaSBP17D | 7D       | 213786904 | 213791354 | 385                    | 40205.21              | 9.13 | -0.759 | Nuclear          | 5              |
| TraesCS7A02G246500 | TaSBP17A | 7A       | 225631628 | 225636261 | 386                    | 40281.35              | 9.02 | -0.751 | Nuclear          | 5              |
| TraesCS7B02G115200 | TaSBP18B | 7B       | 133742358 | 133748024 | 845                    | 93295.12              | 8.45 | -0.314 | Nuclear          | 13             |
| TraesCS7D02G210400 | TaSBP18D | 7D       | 168423642 | 168428099 | 847                    | 93664.32              | 8.64 | -0.344 | Nuclear          | 13             |
| TraesCS7A02G495100 | TaSBP19A | 7A       | 685227875 | 685230770 | 418                    | 44452.59              | 8.95 | -0.627 | Nuclear          | 9              |
| TraesCS7B02G402200 | TaSBP19D | 7B       | 668907244 | 668914987 | 416                    | 44134.14              | 9.05 | -0.647 | Nuclear          | 8              |

Table S2 Wheat SBP gene duplication events

| Duplication type      | Gene ID  | Chrom no | Location  |           | Gene ID  | Chrom no | Location  |           |
|-----------------------|----------|----------|-----------|-----------|----------|----------|-----------|-----------|
| tandem duplication    | TaSBP12D | 7D       | 592632237 | 592634499 | TaSBP14D | 7D       | 592677316 | 592679805 |
|                       | TaSBP13B | 7B       | 668928550 | 668930740 | TaSBP14B | 7B       | 669139219 | 669141554 |
|                       | TaSBP14A | 7A       | 685090082 | 685095954 | TaSBP13A | 7A       | 685212558 | 685214906 |
| segmental duplication | TaSBP1A  | 1A       | 447623204 | 447635025 | TaSBP1B  | 1B       | 467540751 | 467553928 |
|                       | TaSBP1A  | 1A       | 447623204 | 447635025 | TaSBP1D  | 1D       | 347199194 | 347210946 |
|                       | TaSBP1D  | 1D       | 347199194 | 347210946 | TaSBP2A  | 2A       | 276276336 | 276279155 |
|                       | TaSBP1D  | 1D       | 347199194 | 347210946 | TaSBP2B  | 2B       | 260765427 | 260768180 |
|                       | TaSBP2A  | 2A       | 276276336 | 276279155 | TaSBP2D  | 2D       | 206632153 | 206636152 |
|                       | TaSBP3A  | 2A       | 670957294 | 670962629 | TaSBP3D  | 2D       | 525512403 | 525517689 |
|                       | TaSBP4B  | 2B       | 725575939 | 725580611 | TaSBP4D  | 2D       | 596550011 | 596554762 |
|                       | TaSBP4B  | 2B       | 725575939 | 725580611 | TaSBP4A  | 2A       | 730613571 | 730617739 |
|                       | TaSBP5A  | 3A       | 673898993 | 673902601 | TaSBP5B  | 3B       | 713320663 | 713324953 |
|                       | TaSBP5A  | 3A       | 673898993 | 673902601 | TaSBP5D  | 3D       | 538401064 | 538404375 |
|                       | TaSBP7A  | 5A       | 494569538 | 494575755 | TaSBP15A | 7A       | 252715392 | 252720978 |
|                       | TaSBP7D  | 5D       | 391372552 | 391378851 | TaSBP15A | 7A       | 252715392 | 252720978 |
|                       | TaSBP7D  | 5D       | 391372552 | 391378851 | TaSBP15D | 7D       | 237410146 | 237416092 |
|                       | TaSBP11B | 6B       | 200508894 | 200512052 | TaSBP19A | 7A       | 685227875 | 685230770 |
|                       | TaSBP11D | 6D       | 111567310 | 111570133 | TaSBP19A | 7A       | 685227875 | 685230770 |
|                       | TaSBP11D | 6D       | 111567310 | 111570133 | TaSBP14B | 7B       | 669139219 | 669141554 |

Table S3: The primers used in this study

| Gene ID      | Forward                | Reverse                |
|--------------|------------------------|------------------------|
| TaSBP1A/B/D  | AGCTTGCAAAATGACCGAAG   | CATTTTCCTGTTTTGCACCA   |
| TaSBP4B/D    | ACCAAAGGCAAAGCAGCCGGAA | TCTTTCACCACCTCGCCGAGT  |
| TaSBP6A      | TCAGGCTAAGATGTACCCCAA  | GTATCCCAACACAAACGCAGA  |
| TaSBP9A/D    | GGCTCCTTATGTTCAAATGA   | TGTGTGTAACCTTGAAGCCTC  |
| TaSBP9B      | AGTTCAGATTTGCGCCTGTCA  | GTTCCAGTCCTCGTGTTGTCA  |
| TaSBP10A     | GCTGTCCGATCACAATGCT    | TGCCGTCTATCATCAAACACC  |
| TaSBP16A     | ATGCGCTTCTGCCAACAGT    | TGCCAGTTTTGCTCCGGTCT   |
| TaSBP17B/D   | CCAGCGCCAAGGATTACCAC   | TGCATCTGGTTGCCAACTACCG |
| TaSBP18A/B/D | CAGCTCGTCCAACTGGTCT    | GGGCTTCTTCAGTTCCATGCTT |
| TaSBP19B/D   | ATCATCCAAGGCTCCGCAAC   | TGTCCAGCAGCATCTTACCAC  |
| Taactin      | CACACTGGTGTATGGTAGG    | AGAAGGTGTGATGCCAAAT    |
